# Supplementary material for: Retrieving tropospheric NO 2 vertical column densities around the city of Beijing and estimating NO x emissions based on car MAX-DOAS measurements
Source: Copernicus journal article supplement (doi:10.5194/acp-20-10757-2020), 2020-09-14
Supplement: Supplementary file 1 [file acp-20-10757-2020-supplement.pdf]

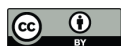

*Supplement of*

**Retrieving tropospheric NO<sub>2</sub> vertical column densities  
around the city of Beijing and estimating NO<sub>x</sub> emissions  
based on car MAX-DOAS measurements**

**Xinghong Cheng et al.**

*Correspondence to:* Xinghong Cheng (cxingh@cma.gov.cn) and Jianzhong Ma (majz@cma.gov.cn)

The copyright of individual parts of the supplement might differ from the CC BY 4.0 License.

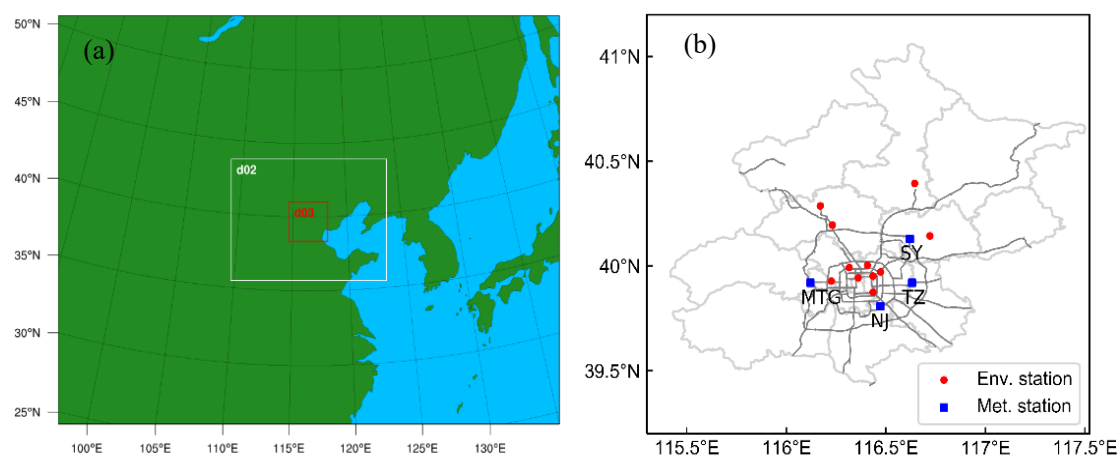

**Figure S1.** Triple-nested domains of (a) the LAPS-WRF-CMAQ model system and (b) the distribution of meteorological/environmental monitoring stations.

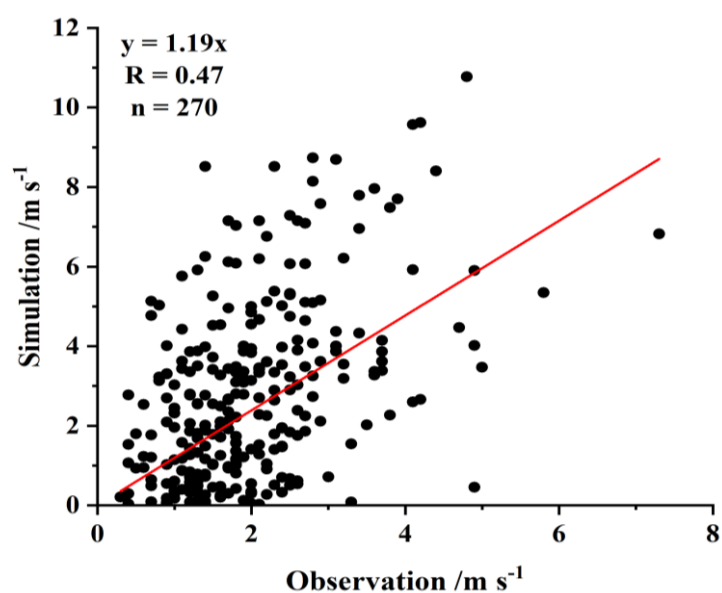

**Figure S2.** Scatterplot of simulated wind speed and observations at four stations in Beijing. The standard deviation of the slope is 0.002.

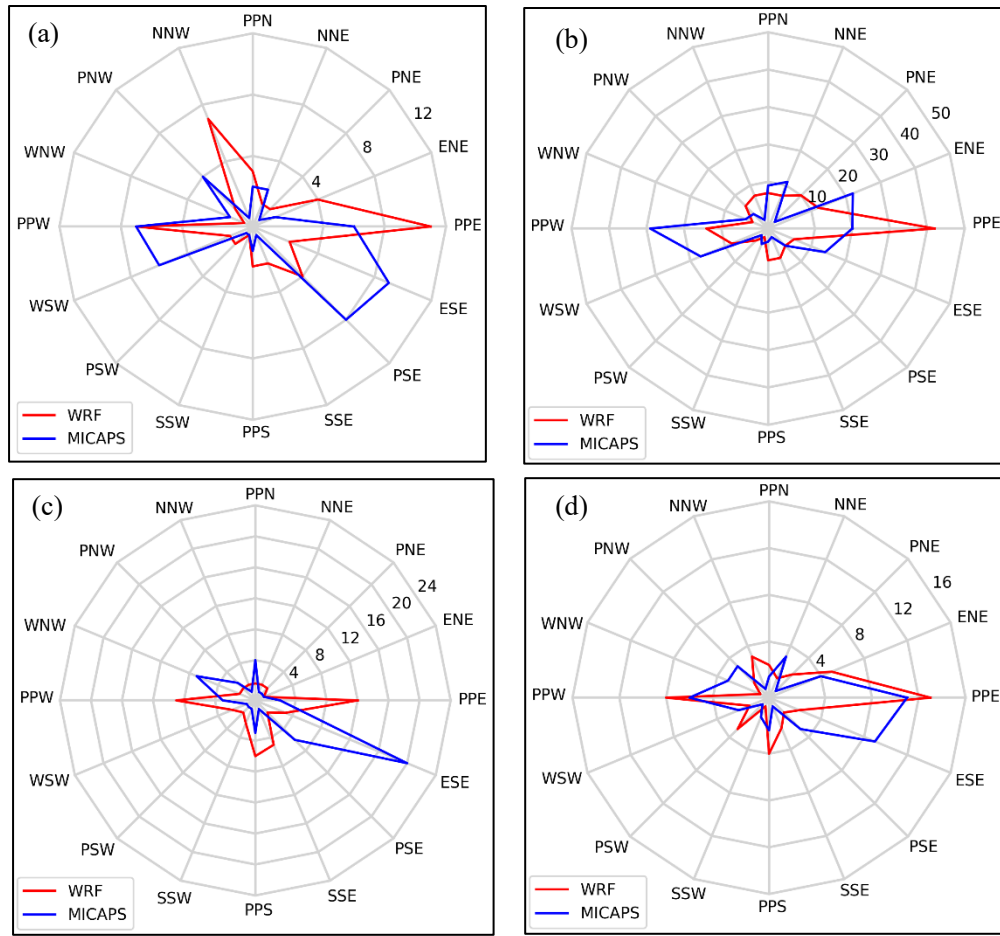

**Figure S3.** Wind rose of simulated wind direction and observations from MICAPS datasets at **(a)** TZ, **(b)** NJ, **(c)** MTG, and **(d)** SY station in Beijing.

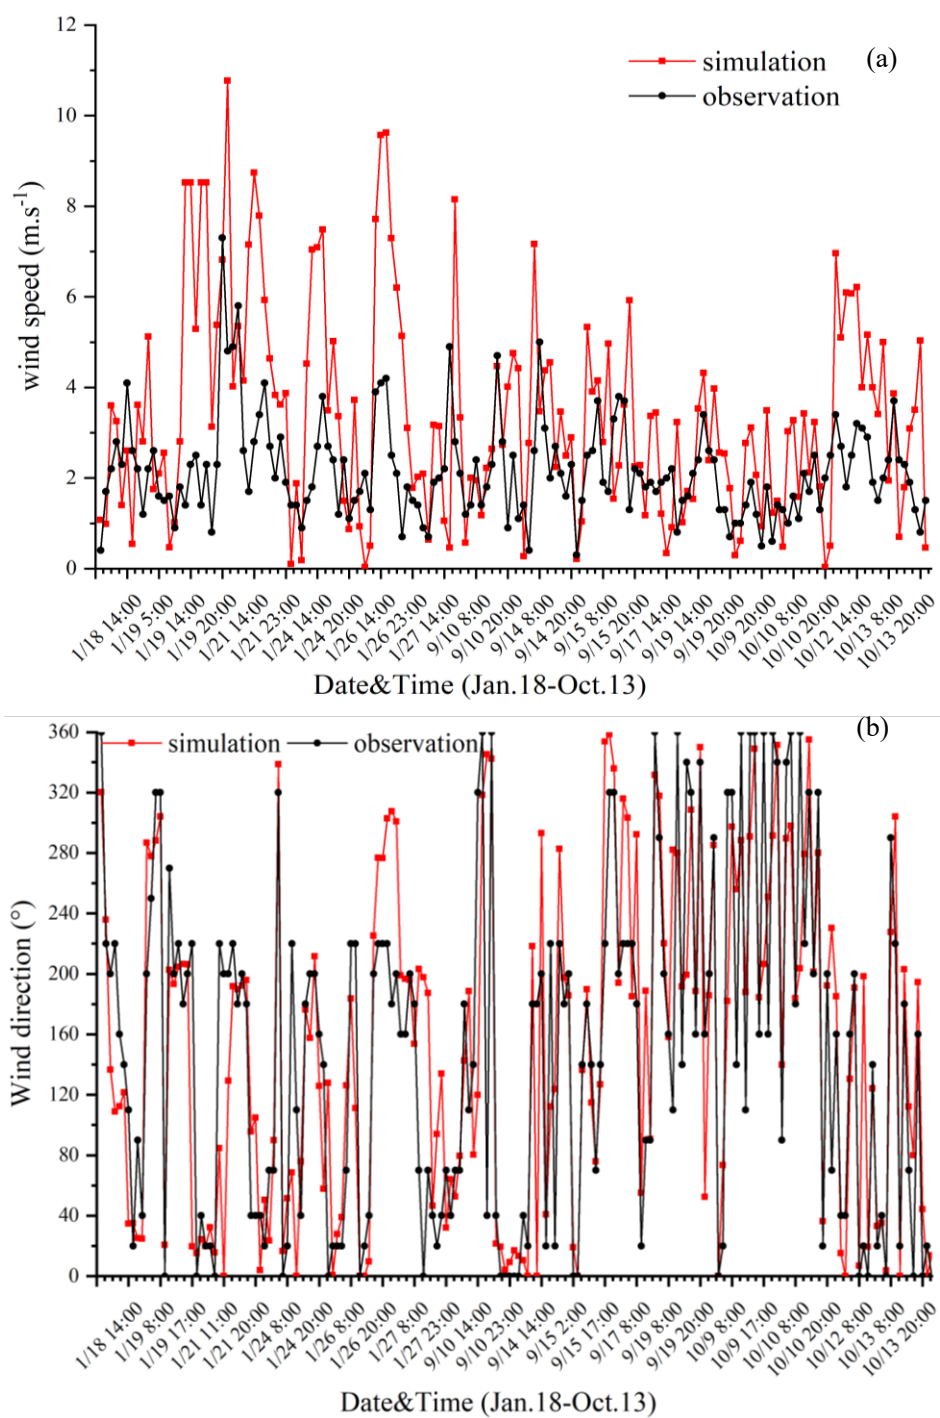

**Figure S4.** Time serial of simulated (a) wind speed and (b) direction, and observations during car MAX-DOAS experiments at four weather stations in Beijing.

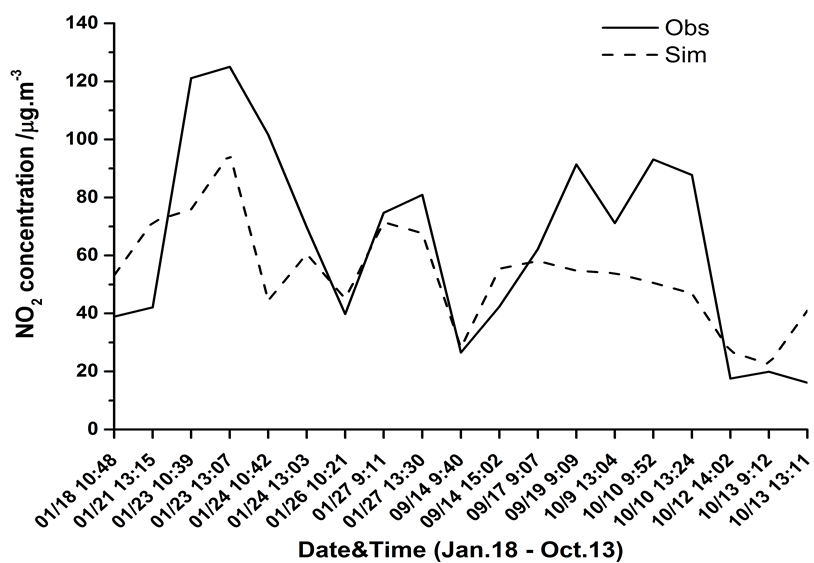

**Figure S5.** Time series of regional average simulation and in situ observation of NO<sub>2</sub> concentration at 12 stations in Beijing.

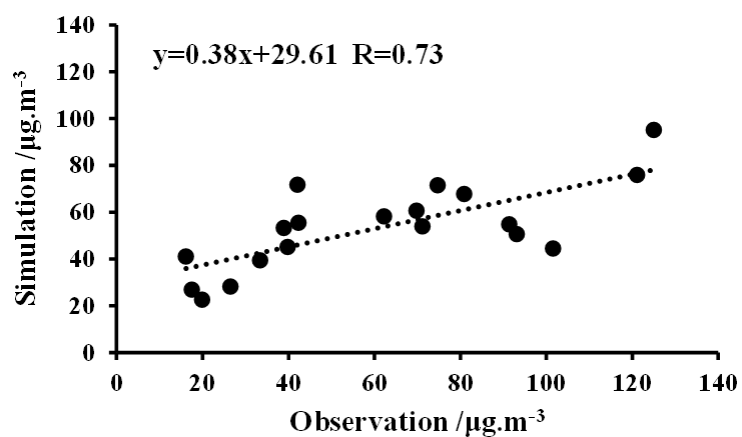

**Figure S6.** Scatter plot between regional average simulation and observation of NO<sub>2</sub> concentration at 12 stations in Beijing.

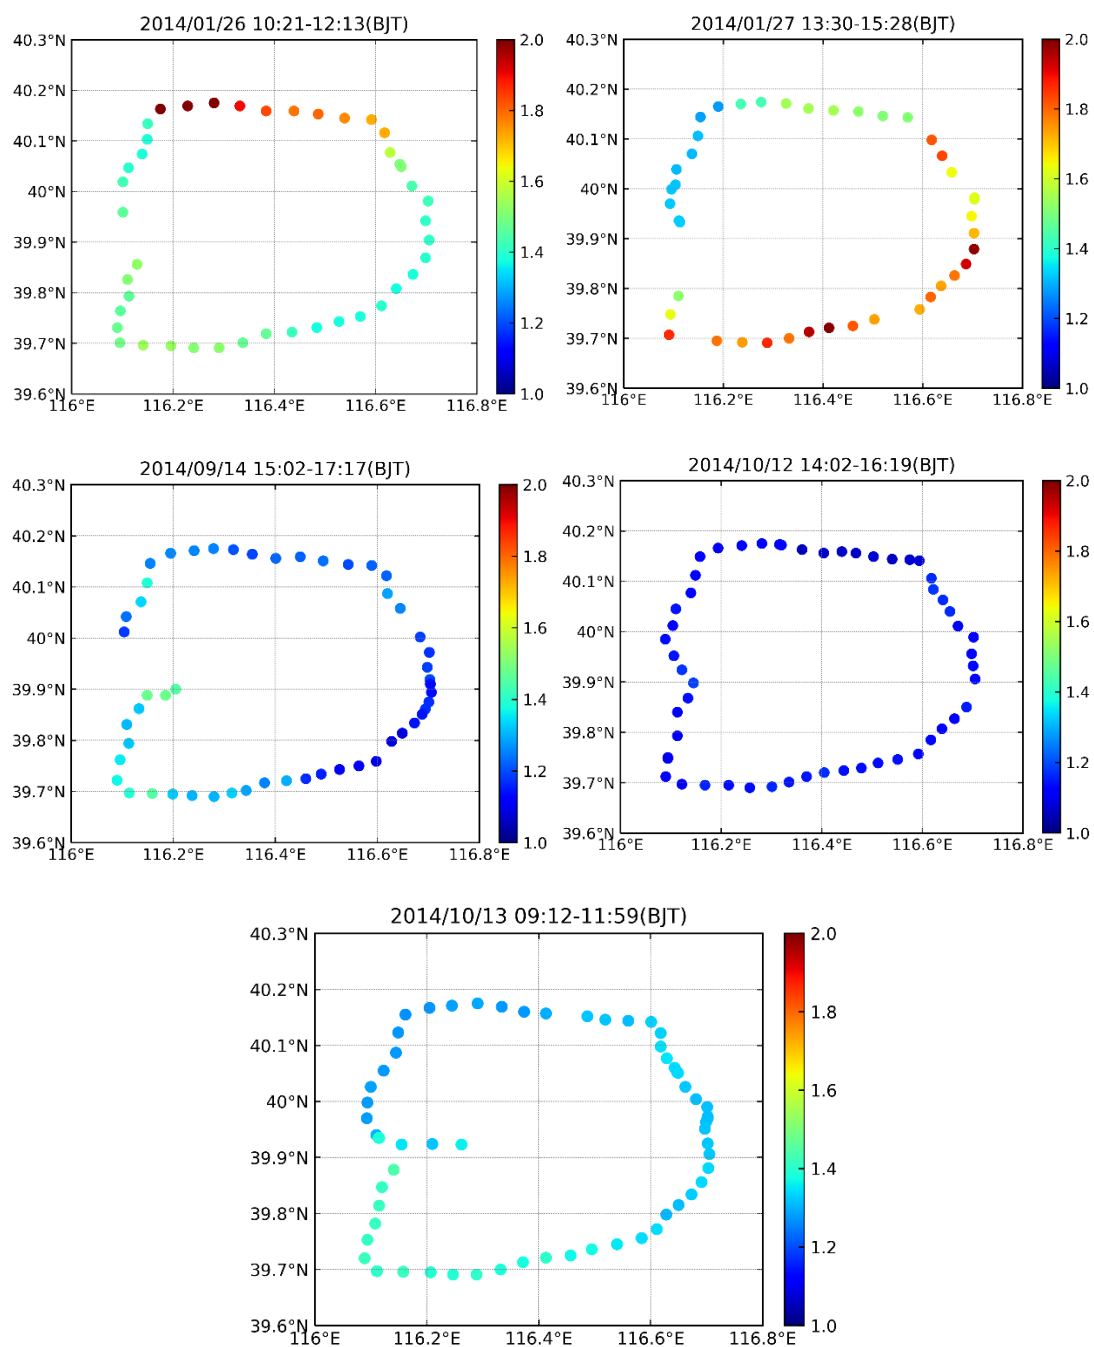

**Figure S7.** Distributions of the ratio of NO<sub>x</sub> and NO<sub>2</sub> on the 6th Ring Rd of Beijing during five journeys.

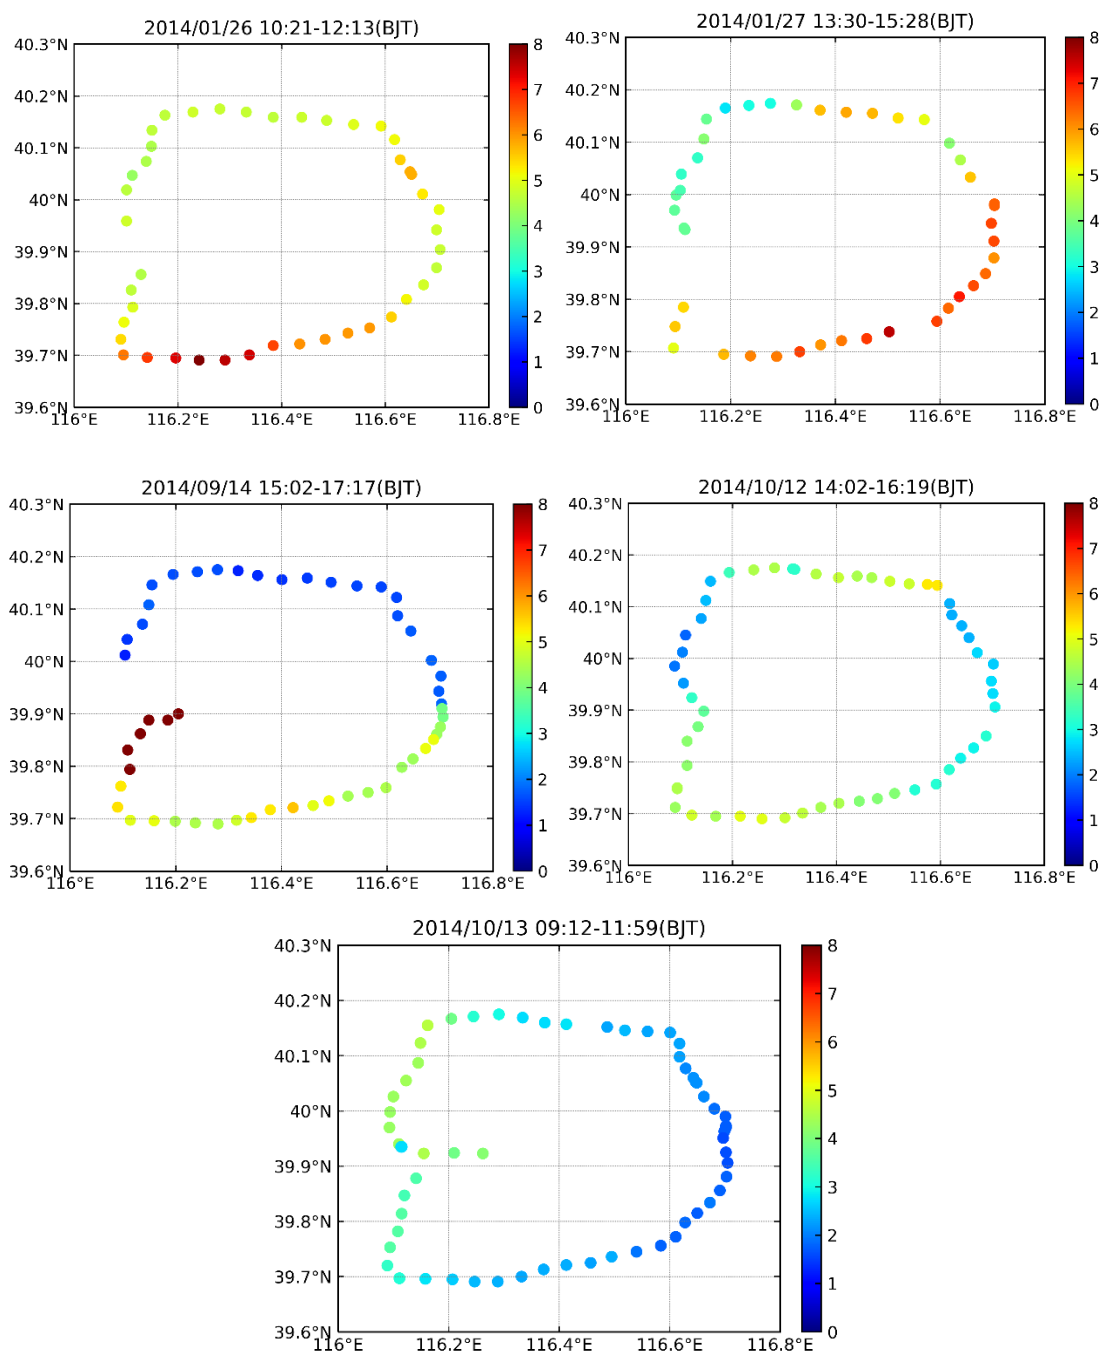

**Figure S8.** Same to figure S7, except for the lifetime of NO<sub>x</sub> (h).

**Table S1.** Four types of monthly  $E_{NOX}$  from the MEIC inventory within the 6th Ring Rd of Beijing in January, September, and October 2012, and the ratio of  $E_{NOX}$  in Jan. to the average in Sep. and Oct.

|           | industry | power | resident | transport | total |
|-----------|----------|-------|----------|-----------|-------|
| January   | 5.78     | 1.92  | 1.39     | 3.94      | 13.02 |
| September | 4.06     | 1.15  | 0.25     | 3.93      | 9.40  |
| October   | 4.03     | 0.93  | 0.26     | 3.93      | 9.15  |
| Ratio     | 1.43     | 1.84  | 5.43     | 1.00      | 1.40  |
